# Supplementary material for: Safety and Efficacy of Local Tranexamic Acid for the Prevention of Surgical Bleeding in Soft-Tissue Surgery: A Review of the Literature and Recommendations for Plastic Surgery
Source: PubMed Central journal article supplement — Plast Reconstr Surg. 2022 Feb 23;149(3):774–87. doi: 10.1097/PRS.0000000000008884 (PMC8860217; doi:10.1097/prs.0000000000008884), 2022-02-23
Supplement: prs-149-774-s001.pdf [file prs-149-774-s001.pdf]

## Appendix, Supplemental Digital Content 1

### Search Strategy Systematic Review March 20<sup>th</sup> 2020

#### PubMed

(((((("Antifibrinolytic Agents"[Mesh]) OR (anti-fibrinolytic\*[Title/Abstract] OR antifibrinolytic\*[Title/Abstract] OR antifibrinolysin\*[Title/Abstract] OR anti-fibrinolysin\*[Title/Abstract] OR antiplasmin\*[Title/Abstract] OR anti-plasmin\*[Title/Abstract] OR "plasmin-inhibitor\*" [Title/Abstract] OR "fibrinolysis-inhibitor\*" [Title/Abstract])) OR ("Tranexamic Acid"[Mesh])) OR (tranexamic[Title/Abstract] OR cyclohexanecarboxylic-acid\*[Title/Abstract] OR methylamine\*[Title/Abstract] OR trans-4-aminomethyl-cyclohexanecarboxylic-acid\*[Title/Abstract] OR t-amcha[Title/Abstract] OR amca[Title/Abstract] OR kabi-2161[Title/Abstract] OR transamin\*[Title/Abstract] OR exacyl[Title/Abstract] OR amchafibrin[Title/Abstract] OR spotof[Title/Abstract] OR cyklokapron[Title/Abstract] OR ugurol-oramino-methylcyclohexanecarboxylate[Title/Abstract] OR aminomethylcyclohexanecarbonic-acid[Title/Abstract] OR aminomethylcyclohexanecarboxylic-acid[Title/Abstract] OR amcha[Title/Abstract] OR amchafibrin[Title/Abstract] OR amikapron[Title/Abstract] OR aminomethyl-cyclohexane-carboxylic-acid[Title/Abstract] OR aminomethyl-cyclohexanecarboxylic-acid[Title/Abstract] OR aminomethylcyclohexane-carbonic-acid[Title/Abstract] OR aminomethylcyclohexane-carboxylic-acid[Title/Abstract] OR aminomethylcyclohexanecarbonic-acid[Title/Abstract] OR aminomethylcyclohexanecarboxylic-acid[Title/Abstract] OR aminomethylcyclohexanocarboxylic-acid[Title/Abstract] OR aminomethylcyclohexanoic-acid[Title/Abstract] OR amstat[Title/Abstract] OR anvitoff[Title/Abstract] OR cl?65336[Title/Abstract] OR cl65336[Title/Abstract] OR cyclocapron[Title/Abstract] OR cyclokapron[Title/Abstract] OR cyklocapron[Title/Abstract] OR exacyl[Title/Abstract] OR frenolyse[Title/Abstract] OR hexacapron[Title/Abstract] OR hexakapron[Title/Abstract] OR tranex[Title/Abstract] OR txa[Title/Abstract])) AND (("Administration, Topical"[Mesh]) OR ("topical\*" [Title/Abstract] OR "intra articular\*" [Title/Abstract] OR "intraarticular\*" [Title/Abstract] OR "local appl\*" [Title/Abstract] OR "appl\* locally" [Title/Abstract] OR "local adminis\*" [Title/Abstract] OR "administered local\*" [Title/Abstract] OR "regional appl\*" [Title/Abstract] OR "applied regional\*" [Title/Abstract] OR "regional adminis\*" [Title/Abstract] OR "adminis\* regionally" [Title/Abstract] OR "irrigat\*" [Title/Abstract] OR "oral" [Title/Abstract] OR "mouthwash\*" [Title/Abstract] OR "rins\*" [Title/Abstract] OR "intra nasal\*" [Title/Abstract] OR "intranasal\*" [Title/Abstract] OR "intra abdominal\*" [Title/Abstract] OR "intraabdominal\*" [Title/Abstract] OR "intra vesical\*" [Title/Abstract] OR "intravesical\*" [Title/Abstract] OR "rectal\*" [Title/Abstract] OR "intra vaginal\*" [Title/Abstract] OR "intravaginal\*" [Title/Abstract] OR "intra uterin\*" [Title/Abstract] OR "intrauterin\*" [Title/Abstract] OR "spray\*" [Title/Abstract])) AND (((((((randomized controlled trial[Publication Type]) OR (controlled clinical trial[Publication Type])) OR (randomized[Title/Abstract])) OR (placebo[Title/Abstract])) OR ("Clinical Trials as Topic"[Mesh:NoExp])) OR (randomly[Title/Abstract])) OR (trial[Title])) NOT (animals[Mesh] NOT humans[Mesh]))

#### MEDLINE via Ovid

- 1 exp Antifibrinolytic Agents/
- 2 (anti-fibrinolytic\* or antifibrinolytic\* or antifibrinolysin\* or anti-fibrinolysin\* or antiplasmin\* or anti-plasmin\* or ((plasmin or fibrinolysis) adj3 inhibitor\*).ti,ab,kw.
- 3 exp Tranexamic Acid/

- 4 (tranexamic or cyclohexanecarboxylic-acid\* or methylamine\* or trans-4-aminomethyl-cyclohexanecarboxylic-acid\* or t-amcha or amca or kabi-2161 or transamin\* or exacyl or amchafibrin or spotof or cyklokapron or ugurol-oramino-methylcyclohexane-carboxylate or aminomethylcyclohexanecarbonic acid or aminomethylcyclohexanecarboxylic acid or amcha or amchafibrin or amikapron or aminomethyl-cyclohexane-carboxylic-acid or aminomethyl-cyclohexanecarboxylic-acid or aminomethylcyclohexane-carbonic-acid or aminomethylcyclohexane carboxylic-acid or aminomethylcyclohexanecarbonic-acid or aminomethylcyclohexanecarboxylic-acid or aminomethylcyclohexanocarboxylic-acid or aminomethylcyclohexanoic-acid or amstat or anvitoff or cl?65336 or cl65336 or cyclocapron or cyclokapron or cyklocapron or exacyl or frenolyse or hexacapron or hexakapron or tranex or txa).ti,ab,kw.
- 5 or/1-4
- 6 exp Administration, Topical/
- 7 (topical\* or intra-articular\* or intraarticular\* or ((local\* or regional\*) adj3 (appl\* or adminis\*\*)) or irrigat\* or oral or mouthwash\* or rins\* or intra-nasal\* or intranasal\* or intra-abdominal\* or intraabdominal\* or intra-vesical\* or intravesical\* or rectal\* or intra-vaginal\* or intravaginal\* or intra-uterin\* or intrauterin\* or spray\*).ti,ab,kw.
- 8 or/6-7
- 9 5 and 8
- 10 randomized controlled trial.pt.
- 11 controlled clinical trial.pt.
- 12 randomized.ab.
- 13 placebo.ab.
- 14 drug therapy.fs.
- 15 randomly.ab.
- 16 trial.ab.
- 17 groups.ab.
- 18 or/10-17
- 19 exp animals/ not humans.sh.
- 20 18 not 19
- 21 9 and 20

#### Embase via Ovid

- 1 exp Antifibrinolytic Agents/
- 2 (anti-fibrinolytic\* or antifibrinolytic\* or antifibrinolysin\* or anti-fibrinolysin\* or antiplasmin\* or anti-plasmin\* or ((plasmin or fibrinolysis) adj3 inhibitor\*)).ti,ab,kw.
- 3 exp Tranexamic Acid/
- 4 (tranexamic or cyclohexanecarboxylic-acid\* or methylamine\* or trans-4-aminomethyl-cyclohexanecarboxylic-acid\* or t-amcha or amca or kabi-2161 or transamin\* or exacyl or amchafibrin or spotof or cyklokapron or ugurol-oramino-methylcyclohexane-carboxylate or aminomethylcyclohexanecarbonic-acid or aminomethylcyclohexanecarboxylic-acid or amcha or amchafibrin or amikapron or aminomethyl-cyclohexane-carboxylic-acid or aminomethyl-cyclohexanecarboxylic-acid or aminomethylcyclohexane-carbonic-acid or aminomethylcyclohexane-carboxylic-acid or aminomethylcyclohexanecarbonic-acid or aminomethylcyclohexanecarboxylic-acid or aminomethylcyclohexanocarboxylic-acid or aminomethylcyclohexanoic-acid or amstat or anvitoff or cl?65336 or cl65336 or cyclocapron

or cyclokapron or cyklocapron or exacyl or frenolyse or hexacapron or hexakapron or tranex  
 or txa).ti,ab,kw.  
 5 or/1-4  
 6 exp Administration, Topical/  
 7 (topical\* or intra-articular\* or intraarticular\* or ((local\* or regional\*) adj3 (appl\* or  
 adminis\*)) or irrigat\* or oral or mouthwash\* or rins\* or intra-nasal\* or intranasal\* or intra-  
 abdominal\* or intraabdominal\* or intra-vesical\* or intravesical\* or rectal\* or intra-vaginal\*  
 or intravaginal\* or intra-uterin\* or intrauterin\* or spray\*).ti,ab,kw.  
 8 or/6-7  
 9 5 and 8  
 10 Randomized controlled trial/  
 11 Controlled clinical study/  
 12 random\$.ti,ab.  
 13 randomization/  
 14 intermethod comparison/  
 15 placebo.ti,ab.  
 16 (compare or compared or comparison).ti.  
 17 ((evaluated or evaluate or evaluating or assessed or assess) and (compare or compared or  
 comparing or comparison)).ab.  
 18 (open adj label).ti,ab.  
 19 ((double or single or doubly or singly) adj (blind or blinded or blindly)).ti,ab.  
 20 double blind procedure/  
 21 parallel group\$1.ti,ab.  
 22 (crossover or cross over).ti,ab.  
 23 ((assign\$ or match or matched or allocation) adj5 (alternate or group\$1 or intervention\$1 or  
 patient\$1 or subject\$1 or participant\$1)).ti,ab.  
 24 (assigned or allocated).ti,ab.  
 25 (controlled adj7 (study or design or trial)).ti,ab.  
 26 (volunteer or volunteers).ti,ab.  
 27 human experiment/  
 28 trial.ti.  
 29 or/10-28  
 30 (random\$ adj sampl\$ adj7 ("cross section\$" or questionnaire\$1 or survey\$ or  
 database\$1)).ti,ab. not (comparative study/ or controlled study/ or randomi?ed-  
 controlled.ti,ab. or randomly-assigned.ti,ab.)  
 31 Cross-sectional study/ not (randomized controlled trial/ or controlled clinical study/ or  
 controlled study/ or randomi?ed controlled.ti,ab. or control group\$1.ti,ab.)  
 32 (((case adj control\$) and random\$) not randomi?ed controlled).ti,ab.  
 33 (Systematic review not (trial or study)).ti.  
 34 (nonrandom\$ not random\$).ti,ab.  
 35 "Random field\$.ti,ab.  
 36 (random cluster adj3 sampl\$).ti,ab.  
 37 (review.ab. and review.pt.) not trial.ti.  
 38 "we searched".ab. and (review.ti. or review.pt.)  
 39 "update review".ab.  
 40 (databases adj4 searched).ab.

- 41 (rat or rats or mouse or mice or swine or porcine or murine or sheep or lambs or pigs or piglets or rabbit or rabbits or cat or cats or dog or dogs or cattle or bovine or monkey or monkeys or trout or marmoset\$1).ti. and animal experiment/
- 42 Animal experiment/ not (human experiment/ or human/)
- 43 or/30-42
- 44 29 not 43
- 45 9 and 44

### Cochrane Library

- #1 MeSH descriptor: [Antifibrinolytic Agents] explode all trees
- #2 MeSH descriptor: [Tranexamic Acid] explode all trees
- #3 (anti-fibrinolytic\* or antifibrinolytic\* or antifibrinolysin\* or anti-fibrinolysin\* or antiplasmin\* or anti-plasmin\*):ti,ab,kw (Word variations have been searched)
- #4 ((plasmin or fibrinolysis) near/3 (inhibitor\*)):ti,ab,kw (Word variations have been searched)
- #5 (tranexamic or "cyclohexanecarboxylic acid\*" or methylamine\* or "trans 4 aminomethyl cyclohexanecarboxylic acid\*" or "t amcha" or amca or "kabi 2161" or transamin\* or exacyl or amchafibrin or spotof or cyklokapron or "ugurool oramino methylcyclohexane carboxylate" or "aminomethylcyclohexanecarbonic acid" or "aminomethylcyclohexanecarboxylic acid" or amcha or amchafibrin or amikapron or "aminomethyl cyclohexane carboxylic acid" or "aminomethyl cyclohexanecarboxylic acid" or "aminomethylcyclohexane carbonic acid" or "aminomethylcyclohexane carboxylic acid" or "aminomethylcyclohexanecarbonic acid" or "aminomethylcyclohexanecarboxylic acid" or "aminomethylcyclohexanecarboxylic acid" or "aminomethylcyclohexanoic acid" or amstat or anvitoff or cl?65336 or cl65336 or cyclocapron or cyclokapron or cyklocapron or exacyl or frenolyse or hexacapron or hexakapron or tranex or txa):ti,ab,kw (Word variations have been searched)
- #6 #1 OR #2 OR #3 OR #4 OR #5
- #7 MeSH descriptor: [Administration, Topical] explode all trees
- #8 (topical\* or intra-articular\* or intraarticular\* or irrigat\* or oral or mouthwash\* or rins\* or "intra nasal\*" or intranasal\* or "intra abdominal\*" or intraabdominal\* or "intra vesical\*" or intravesical\* or rectal\* or "intra vaginal\*" or intravaginal\* or "intra uterin\*" or intrauterin\* or spray\*):ti,ab,kw (Word variations have been searched)
- #9 ((local\* or regional\*) near/3 (appl\* or adminis\*)):ti,ab,kw (Word variations have been searched)
- #10 #7 OR #8 OR #9
- #11 #6 AND #10

### Web of Science

- # 13 #12 AND #8 AND #5 Indexes=SCI-EXPANDED, SSCI, A&HCI, CPCI-S, CPCI-SSH, ESCI Timespan=All years
- # 12 #9 OR #10 OR #11 Indexes=SCI-EXPANDED, SSCI, A&HCI, CPCI-S, CPCI-SSH, ESCI Timespan=All years
- # 11 TS=(("singl\*" OR "doubl\*" OR "trebl\*" OR "tripl\*") SAME ("blind\*" OR "mask\*")) Indexes=SCI-EXPANDED, SSCI, A&HCI, CPCI-S, CPCI-SSH, ESCI Timespan=All years
- # 10 TS=("controlled clinical trial" OR "controlled trial" OR "clinical trial" OR "placebo") Indexes=SCI-EXPANDED, SSCI, A&HCI, CPCI-S, CPCI-SSH, ESCI Timespan=All years

- # 9 TS=("randomised" OR "randomized" OR "randomly" OR "random order" OR "random sequence" OR "random allocation" OR "randomly allocated" OR "at random" OR "randomized controlled trial") Indexes=SCI-EXPANDED, SSCI, A&HCI, CPCI-S, CPCI-SSH, ESCI Timespan=All years
- # 8 #6 OR #7 Indexes=SCI-EXPANDED, SSCI, A&HCI, CPCI-S, CPCI-SSH, ESCI Timespan=All years
- # 7 TS(("local\*" or "regional\*") NEAR/3 ("appl\*" or "adminis\*")) Indexes=SCI-EXPANDED, SSCI, A&HCI, CPCI-S, CPCI-SSH, ESCI Timespan=All years
- # 6 TS=("topical\*" or "intra articular\*" or "intraarticular\*" or "irrigat\*" or "oral" or "mouthwash\*" or "rins\*" or "intra nasal\*" or "intranasal\*" or "intra abdominal\*" or "intraabdominal\*" or "intra vesical\*" or "intravesical\*" or "rectal\*" or "intra-vaginal\*" or "intravaginal\*" or "intra uterin\*" or "intrauterin\*" or "spray\*") Indexes=SCI-EXPANDED, SSCI, A&HCI, CPCI-S, CPCI-SSH, ESCI Timespan=All years
- # 5 #1 OR #2 OR #3 OR #4 Indexes=SCI-EXPANDED, SSCI, A&HCI, CPCI-S, CPCI-SSH, ESCI Timespan=All years
- # 4 TS=("amcha" or "amchafibrin" or "amikapron" or "aminomethyl cyclohexane carboxylic acid" or "aminomethyl cyclohexanecarboxylic acid" or "aminomethylcyclohexane carbonic acid" or "aminomethylcyclohexane carboxylic acid" or "aminomethylcyclohexanecarbonic acid" or "aminomethylcyclohexanecarboxylic acid" or "aminomethylcyclohexanocarboxylic acid" or "aminomethylcyclohexanoic acid" or "amstat" or "anvitoff" or "cl-65336" or "cl65336" or "cyclocapron" or "cyklokapron" or "cyklocapron" or "exacyl" or "frenolyse" or "hexacapron" or "hexakapron" or "tranex" or "txa") Indexes=SCI-EXPANDED, SSCI, A&HCI, CPCI-S, CPCI-SSH, ESCI Timespan=All years
- # 3 TS=("tranexamic" or "cyclohexanecarboxylic acid\*" or "methylamine\*" or "amcha" or "trans-4-aminomethyl-cyclohexanecarboxylic acid\*" or "t-amcha" or "amca" or "kabi 2161" or "transamin\*" or "exacyl" or "amchafibrin" or "anvitoff" or "spotof" or "cyklokapron" or "ugurool oramino methylcyclohexane carboxylate" or "aminomethylcyclohexanecarbonic acid" or "aminomethylcyclohexanecarboxylic acid") Indexes=SCI-EXPANDED, SSCI, A&HCI, CPCI-S, CPCI-SSH, ESCI Timespan=All years
- # 2 TS((((("plasmin" or "fibrinolysis") NEAR/3 "inhibitor\*")) Indexes=SCI-EXPANDED, SSCI, A&HCI, CPCI-S, CPCI-SSH, ESCI Timespan=All years
- # 1 TS=("anti-fibrinolytic\*" or "antifibrinolytic\*" or "antifibrinolysin"\* or "anti-fibrinolysin\*" or "antiplasmin\*" or "anti-plasmin\*") Indexes=SCI-EXPANDED, SSCI, A&HCI, CPCI-S, CPCI-SSH, ESCI Timespan=All years

[ClinicalTrials.gov](http://ClinicalTrials.gov)

(antifibrinolytic OR anti-fibrinolytic OR "tranexamic acid") AND Interventional Studies
